# Supplementary material for: Infestation symptoms as indicators of a sustained bark beetle outbreak in conserved and managed Norway spruce stands in south-eastern Finland
Source: Research Square preprint supplement (doi:10.21203/rs.3.rs-3585830/v1), 2024-11-18
Supplement: Supplementary file 1 [file 210d071ffb454c239eef7e74.pdf]

## Supplementary information (SI)

### Appendix A – Weather data

**Table A1.** Mean annual temperature (ann. temp.), annual precipitation sum (ann. prec. sum), mean temperature of summer months (summer temp., May-August) and summer precipitation sum (summer prec. sum, May-August) for the period 2014-2021 in Ruokolahti. s.d. = standard deviation.

| Year | Ann. temp. | Ann. prec. sum | Summer temp. | Summer prec. sum |
|------|------------|----------------|--------------|------------------|
| 2014 | 4.95       | 562            | 14.18        | 331              |
| 2015 | 5.50       | 542            | 13.13        | 190              |
| 2016 | 4.44       | 729            | 14.70        | 403              |
| 2017 | 4.21       | 659            | 12.10        | 233              |
| 2018 | 4.54       | 520            | 15.68        | 178              |
| 2019 | 4.58       | 552            | 13.40        | 188              |
| 2020 | 5.93       | 622            | 13.53        | 220              |
| 2021 | 3.98       | 574            | 15.48        | 274              |
| Mean | 4.77       | 595            | 14.02        | 252              |
| s.d. | 0.66       | 70.24          | 1.22         | 79.58            |

### Appendix B - Trees symptoms of SBB infestations (examples)

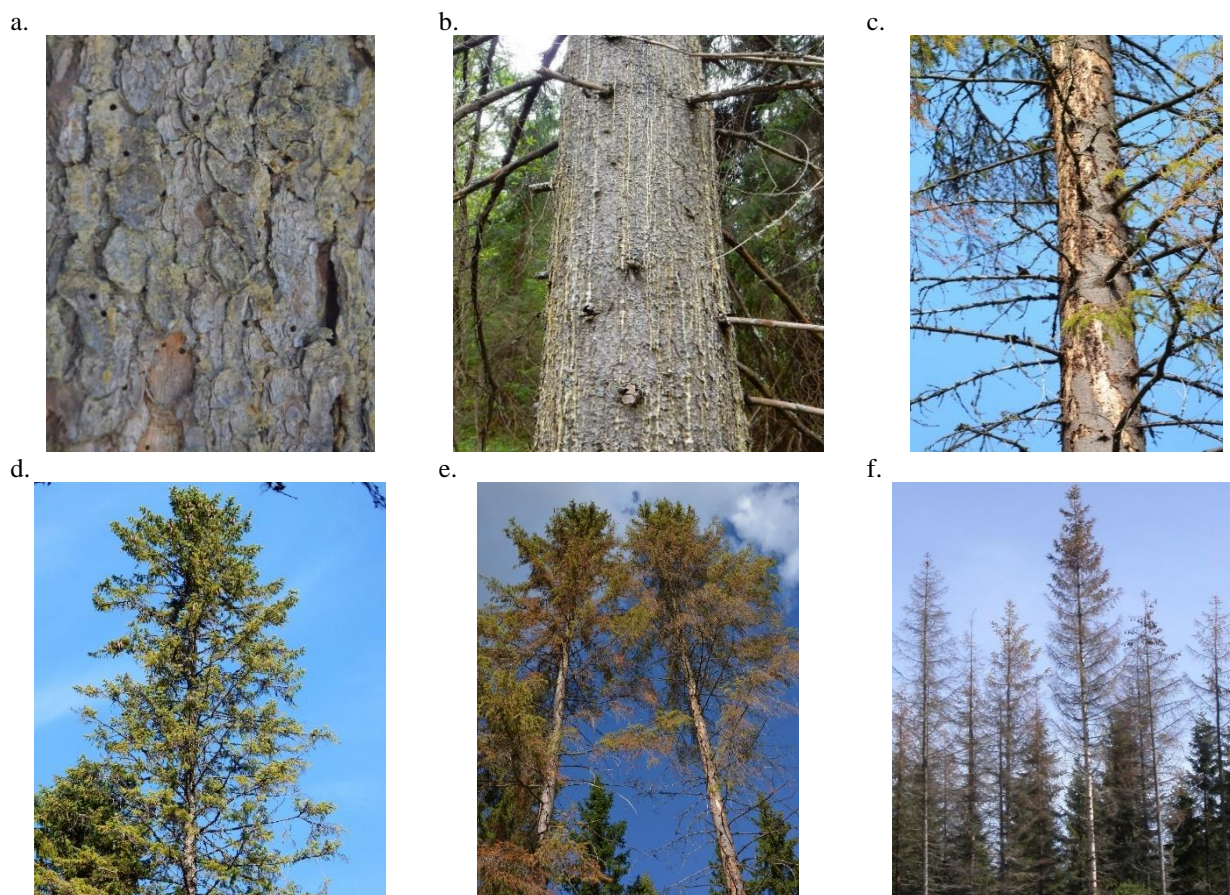

**Fig. B1** Selected examples of classification of visible symptoms caused by SBB; a) over 10 holes up to 2 m height and a moderate bark damage, b) over 30 resin spots, c) high bark damage with yellow to red crown, d) a spruce with yellowish crown and defoliation of 25 - 49 %, e) spruces with a crown turning red and defoliation of 0 - 24%, f) spruces with dead grey crown and defoliation of 75 – 100%

Photos by Päivi Lyytikäinen-Saarenmaa

Appendix C - Figures

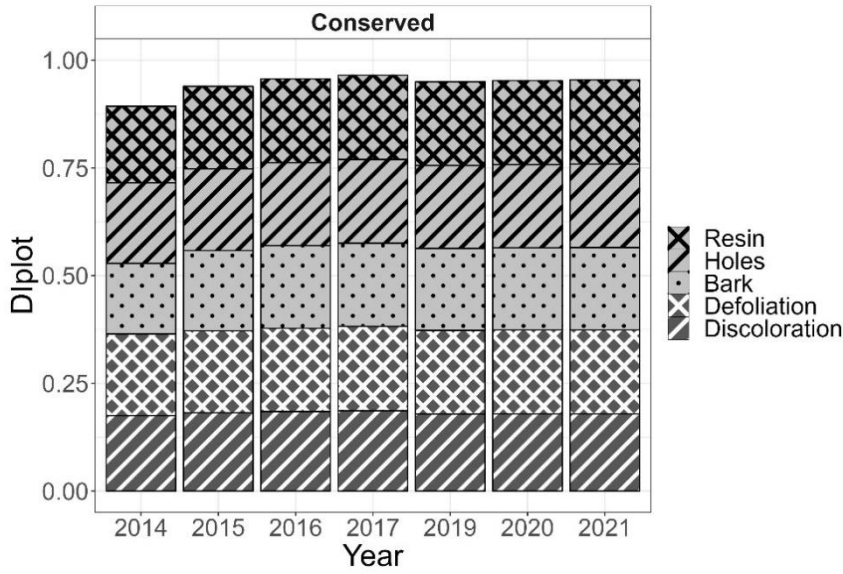

Fig. C1 The SBB damage index (DIplot) of the plots using data from 5 m radius from the centre of damage spot

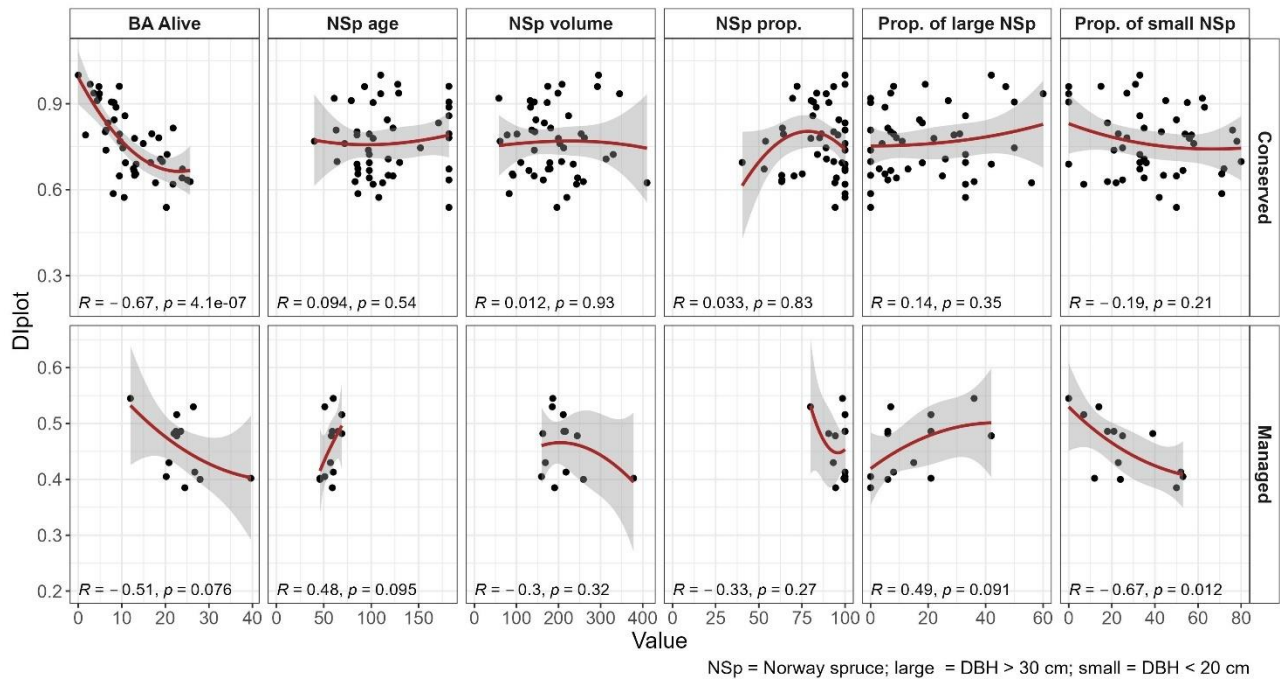

Fig. C2 The relation between the SBB damage index (DIplot) and stand variables in conserved and managed areas. Where 'BA Alive' is the basal area of alive trees (m<sup>2</sup>/ha), 'NSp age' is the average age of spruce (years), 'NSp volume' is the total volume of spruce (m<sup>3</sup>/ha), 'NSp prop' is the proportion of spruce (%), 'Prop. of large NSp' is the proportion of spruces larger than 30 cm (%), and 'Prop. of small NSp' is the proportion of spruce smaller than 20 cm. The line represents the local regression line (LOESS regression), used to fit a regression model for each variable (with a span value of 5)

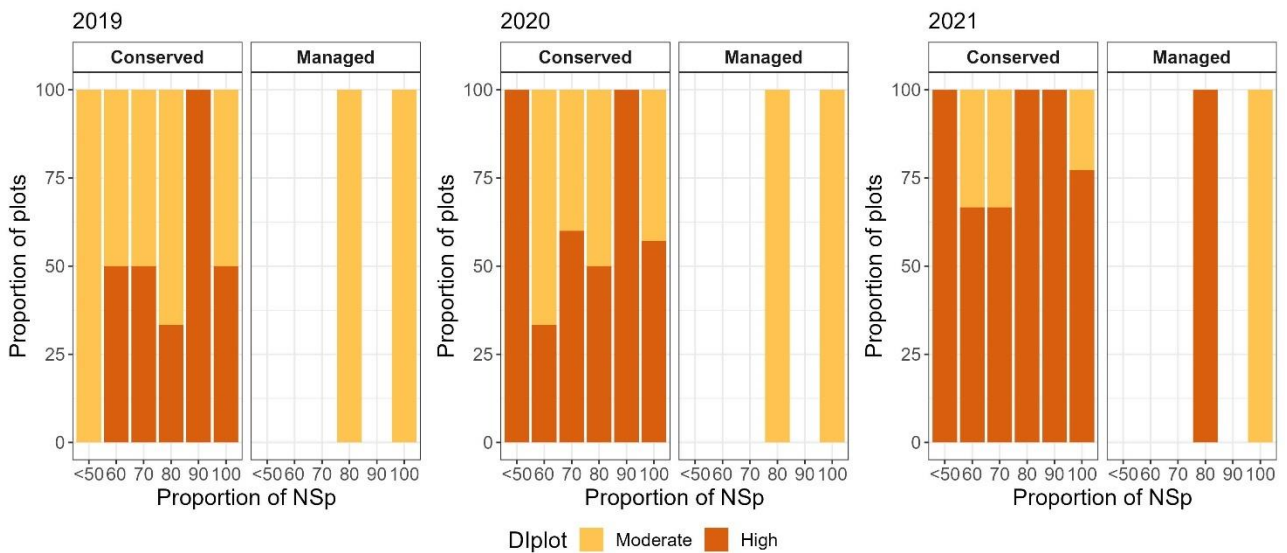

**Fig. C3** The damage score classes shown for proportion of Norway spruce in the plots. Where in legend Low = DIplot 0-0.29, Moderate = DIplot 0.30-0.69, High = DIplot 0.70-1.0

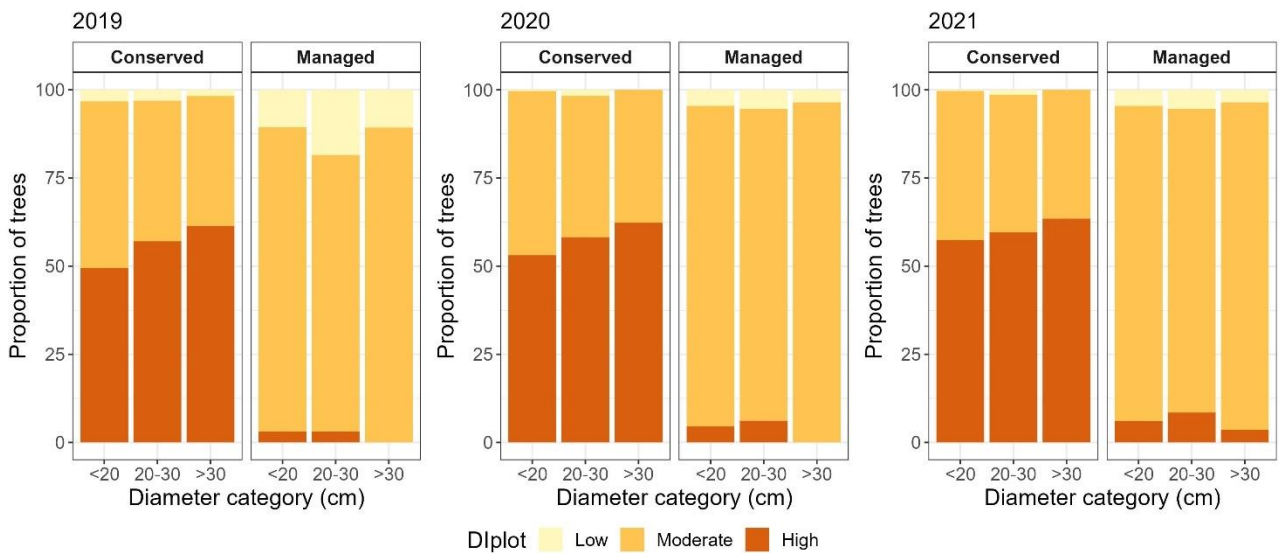

**Fig. C4** The damage score classes shown for diameter classes of the trees. Where in legend Low = DIplot 0-0.29, Moderate = DIplot 0.30-0.69, High = DIplot 0.70-1.0

## Appendix D – Statistical analysis results

**Table D1.** P-values of pairwise comparisons using Wilcoxon rank sum test with Bonferroni correction, showing differences in the way symptoms show the infestation intensity of the individual trees. A p-value < 0.05 means that there are significant differences between trees symptoms type. The differences were tested for 2019, 2020, and 2021.

| Symptoms      | Bark   |        |        | Defoliation |      |      | Discoloration |      |      | Holes        |              |              |
|---------------|--------|--------|--------|-------------|------|------|---------------|------|------|--------------|--------------|--------------|
|               | 2019   | 2020   | 2021   | 2019        | 2020 | 2021 | 2019          | 2020 | 2021 | 2019         | 2020         | 2021         |
| Defoliation   | < 0.05 | < 0.05 | < 0.05 |             | <    | <    |               |      |      |              |              |              |
| Discoloration | < 0.05 | < 0.05 | < 0.05 | 0.10        | 0.05 | 0.05 |               |      |      |              |              |              |
| Holes         | < 0.05 | < 0.05 | < 0.05 | 0.20        | 0.06 | 0.05 | <             | <    | <    | 0.05         | 0.05         | 0.05         |
| Resin         | < 0.05 | < 0.05 | < 0.05 | 0.05        | 0.05 | 0.05 | <             | <    | <    | 0.05         | 0.05         | 0.05         |
|               |        |        |        |             |      |      |               |      |      | <b>1.000</b> | <b>1.000</b> | <b>1.000</b> |

**Table D2a.** Mixed-design ANOVA test, showing differences in SBB damage (DIplot) between different treatments and years. The year was used as the within-group variable, and the treatment as the between-group variable.

| Effect                            | df | MSE  | F      | p.value |
|-----------------------------------|----|------|--------|---------|
| Treatment<br>(Conserved; managed) | 61 | 0.03 | 65.32  | <0.001  |
| Year<br>(2019, 2020, 2021)        | 60 | 0.00 | 135.71 | <0.001  |
| Treatment:Year                    | 60 | 0.00 | 13.86  | <0.001  |

**Table D2b.** Pairwise comparison results (using Tukey method), showing differences in SBB damage (DIplot) within years.

| Period    | Conserved                                            | Managed                                              |
|-----------|------------------------------------------------------|------------------------------------------------------|
| 2019-2020 | SE = 0.00239<br>t.ratio = -8.312<br>p.value < 0.0001 | SE = 0.00468<br>t.ratio = -9.811<br>p.value < 0.0001 |
| 2020-2021 | SE = 0.00249<br>t.ratio = -7.085<br>p.value < 0.0001 | SE = 0.00489<br>t.ratio = -5.020<br>p.value = 0.0001 |
| 2019-2021 | SE = 0.00389<br>t.ratio = -9.652<br>p.value < 0.0001 | SE = 0.00765<br>t.ratio = -9.247<br>p.value < 0.0001 |

**Table D2c.** Pairwise comparison results (using Tukey method), showing differences in SBB damage (DIplot) between treatments (Conserved vs Managed) for each year.

| Year | Conserved vs Managed                                |
|------|-----------------------------------------------------|
| 2019 | SE = 0.03472<br>t.ratio = 8.257<br>p.value < 0.0001 |
| 2020 | SE = 0.03301<br>t.ratio = 7.896<br>p.value < 0.0001 |
| 2021 | SE = 0.03199<br>t.ratio = 7.932<br>p.value < 0.0001 |
